# Supplementary material for: Analysis of Contractility and Invasion Potential of Two Canine Mammary Tumor Cell Lines
Source: PubMed Central journal article supplement (PMC5600937; doi:10.3389/fvets.2017.00149), 2017-09-12
Supplement: image_1.pdf [file image_1.pdf]

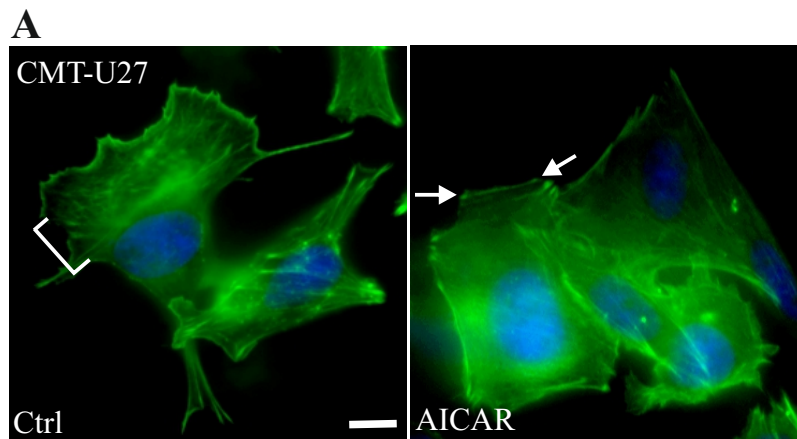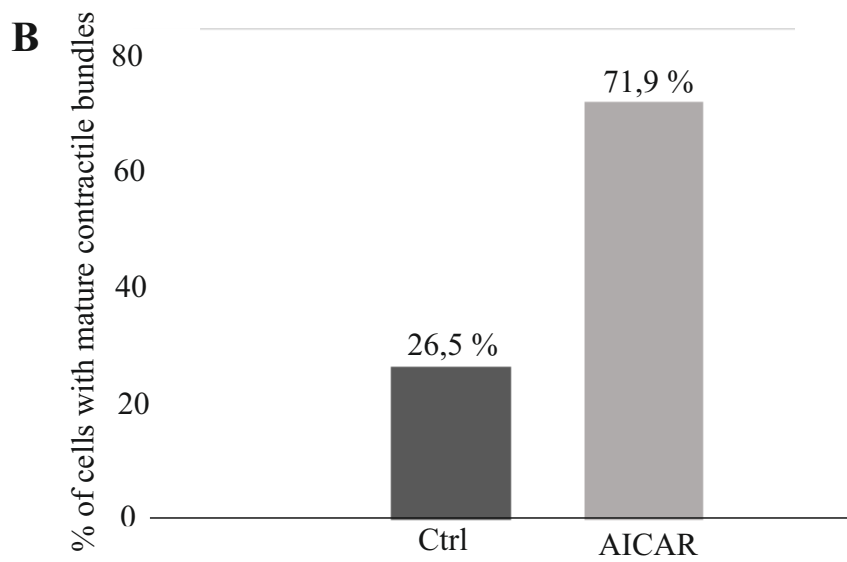

Rajakylä et al., Supplementary Figure 1
